# Supplementary material for: Consumption of carotenoid-rich Momordica cochinchinensis (Gac) aril improves glycemic control in type 2 diabetic mice partially through taste receptor type 1 mediated glucagon-like peptide 1 secretion
Source: Royal Society of Chemistry journal article supplement (doi:10.1039/d4fo04316b), 2024-01-01
Supplement: d4fo04316b1.pdf [file d4fo04316b1.pdf]

**Supplementary Data:**

**Table 1. Nutrient Composition and Calorie of experimental diet**

|                     | Research Diet 45%HFD | Charles River Normal Chew |
|---------------------|----------------------|---------------------------|
|                     | D12451               | (MFG)                     |
| Protein (%)         | 23.7                 | 22.9                      |
| Carbohydrate (%)    | 40.7                 | 54.2                      |
| Fiber (%)           | 5.8                  | 3.4                       |
| Fat (%)             | 23.6                 | 5.4                       |
| Mineral (%)         | 5.8                  | 6.2                       |
| Vitamin (%)         | 0.1                  | 2.4                       |
| Calorie (Kcal/100g) | 470                  | 357                       |

**Table 2. 8 Nutritional Composition of Ripe Gac pulp and Gac aril**

| Contents             | Unit      | Pulp         | Aril         |
|----------------------|-----------|--------------|--------------|
| Calories             | Kcal/100g | 17.4         | 125.86       |
| Protein              | g/ 100g   | 0.6          | 1.65         |
| Fat                  | g/ 100g   | Not detected | 7.21         |
| Saturated Fatty Acid | g/ 100g   | Not detected | 2.47         |
| Tans Fatty Acid      | g/ 100g   | Not detected | Not detected |
| Carbohydrates        | g/ 100g   | 5.5          | 14.51        |
| Sugar                | g/ 100g   | Not detected | 10.75        |
| Fiber                | g/ 100g   | 3.5          | 1.82         |
| Water                | g/100g    | 92.5         | 76.08        |
| Ash                  | g/ 100g   | 1.4          | 0.55         |
| Sodium               | mg/ 100g  | 2.5          | 1.97         |

**Table 3. Carotenoid and vitamin content of Ripe Gac pulp and Gac aril**

| Item                | Unit    | Pulp         | Aril         |
|---------------------|---------|--------------|--------------|
| Lycopene            | mg/kg   | 29.6         | 1,322.1      |
| $\beta$ -Carotene   | mg/kg   | Not detected | 48.2         |
| Lutein              | mg/kg   | Not detected | Not detected |
| Zeaxanthin          | mg/kg   | Not detected | Not detected |
| Vitamin B1          | mg/100g | Not detected | 0.31         |
| Vitamin B2          | mg/100g | 0.09         | 0.42         |
| Vitamin B3 (Niacin) | mg/kg   | 0.34         | 2.88         |
| Vitamin B5          | mg/kg   | 0.65         | 1.22         |
| Vitamin B6          | mg/kg   | 1.06         | 2.5          |
| Vitamin C           | mg/kg   | 4.36         | 2.19         |
| Vitamin E           | mg/kg   | 16.05        | Not detected |

**Table 4. Fatty acid content of Ripe Gac pulp and Gac aril.**

| Item                         | Unit   | Pulp         | Aril         |
|------------------------------|--------|--------------|--------------|
| Fat                          | g/100g | Not detected | 7.21         |
| Total Saturated Fatty Acid   | g/100g | Not detected | 2.47         |
| Total Unsaturated Fatty Acid | g/100g | Not detected | 4.66         |
| Total Trans Fatty Acid       | g/100g | Not detected | Not detected |
| $\omega$ -3 Fatty Acids      | g/100g | Not detected | 3.22         |
| $\omega$ -6 Fatty Acids      | g/100g | Not detected | 3.22         |
| $\omega$ -9 Fatty Acids      | g/100g | Not detected | 1.37         |
